# Supplementary material for: Clinical features and corresponding immune function status of recurrent viral polymerase chain reaction positivity in patients with COVID-19 : A meta- analysis and systematic review
Source: PubMed Central journal article supplement — Int J Immunopathol Pharmacol. 2021 Jun 24;35:20587384211027679. doi: 10.1177/20587384211027679 (PMC8236784; doi:10.1177/20587384211027679), 2021-06-24
Supplement: sj-pdf-4-iji-10.1177_20587384211027679.pdf [file sj-pdf-4-iji-10.1177_20587384211027679.pdf]

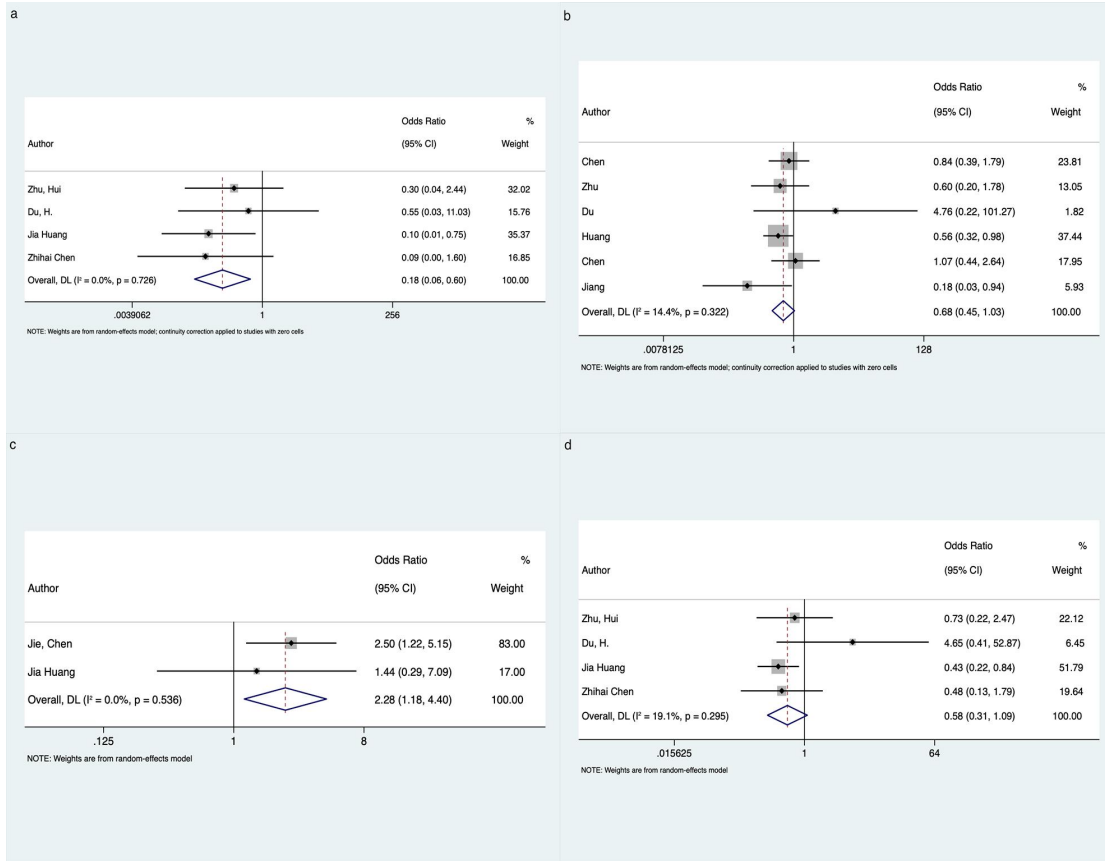

Supplementary Fig. 4 Aspartate aminotransferase (AST)-related forest (a), C reactive protein (CRP)-related forest (b), interleukin-6 (IL-6)-related forest (c), and lactate dehydrogenase (LDH) related forest (d).
