# Supplementary material for: Clinical features and corresponding immune function status of recurrent viral polymerase chain reaction positivity in patients with COVID-19 : A meta- analysis and systematic review
Source: PubMed Central journal article supplement — Int J Immunopathol Pharmacol. 2021 Jun 24;35:20587384211027679. doi: 10.1177/20587384211027679 (PMC8236784; doi:10.1177/20587384211027679), 2021-06-24
Supplement: sj-pdf-5-iji-10.1177_20587384211027679.pdf [file sj-pdf-5-iji-10.1177_20587384211027679.pdf]

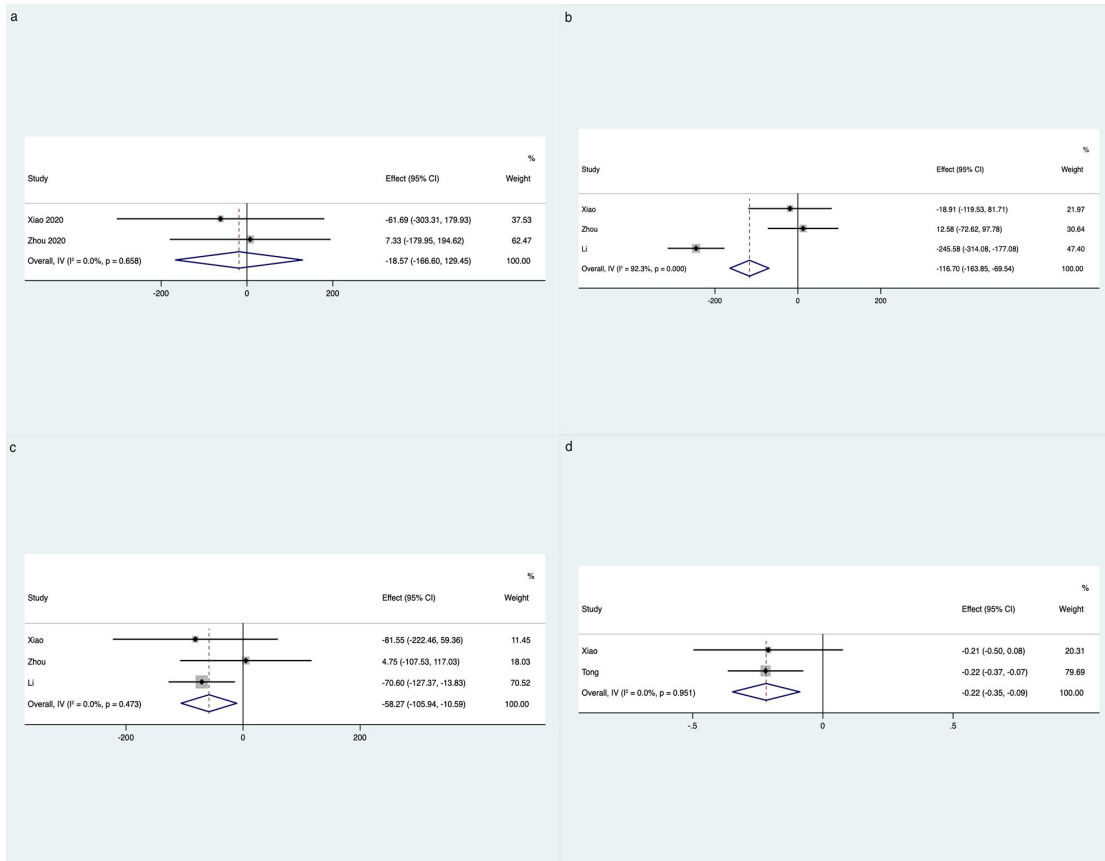

Supplemental Fig. 5 CD3+ T cells related forest (a), CD8 + T cells counts related forest (b), CD4+ T cells related forest (c) and the ratio of CD4+ T cells/CD8+ T cells related forest (d).
