# Supplementary figures and images for: Clinical features and corresponding immune function status of recurrent viral polymerase chain reaction positivity in patients with COVID-19 : A meta- analysis and systematic review
Source: PubMed Central journal article supplement — Int J Immunopathol Pharmacol. 2021 Jun 24;35:20587384211027679. doi: 10.1177/20587384211027679 (PMC8236784; doi:10.1177/20587384211027679), 2021-06-24

a

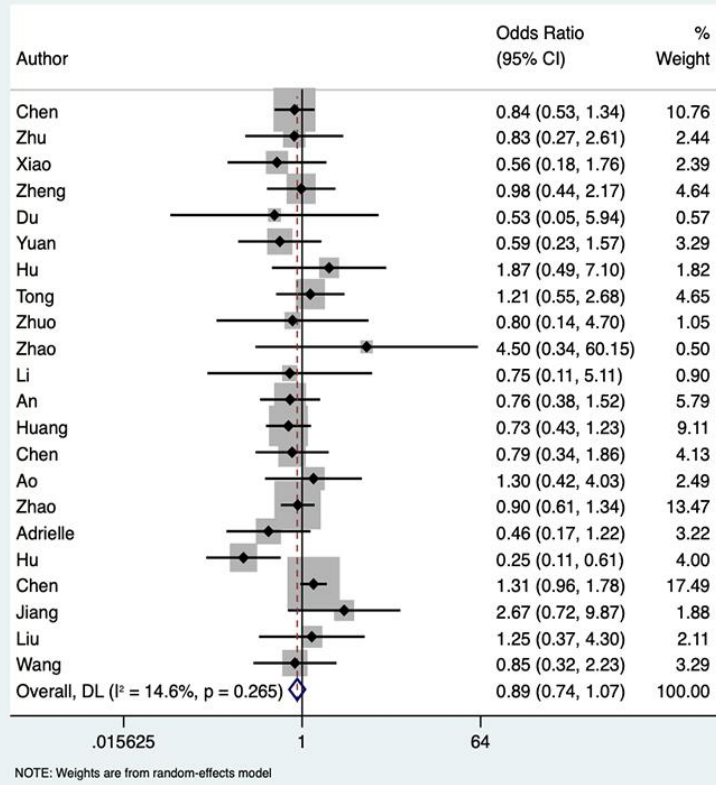

b

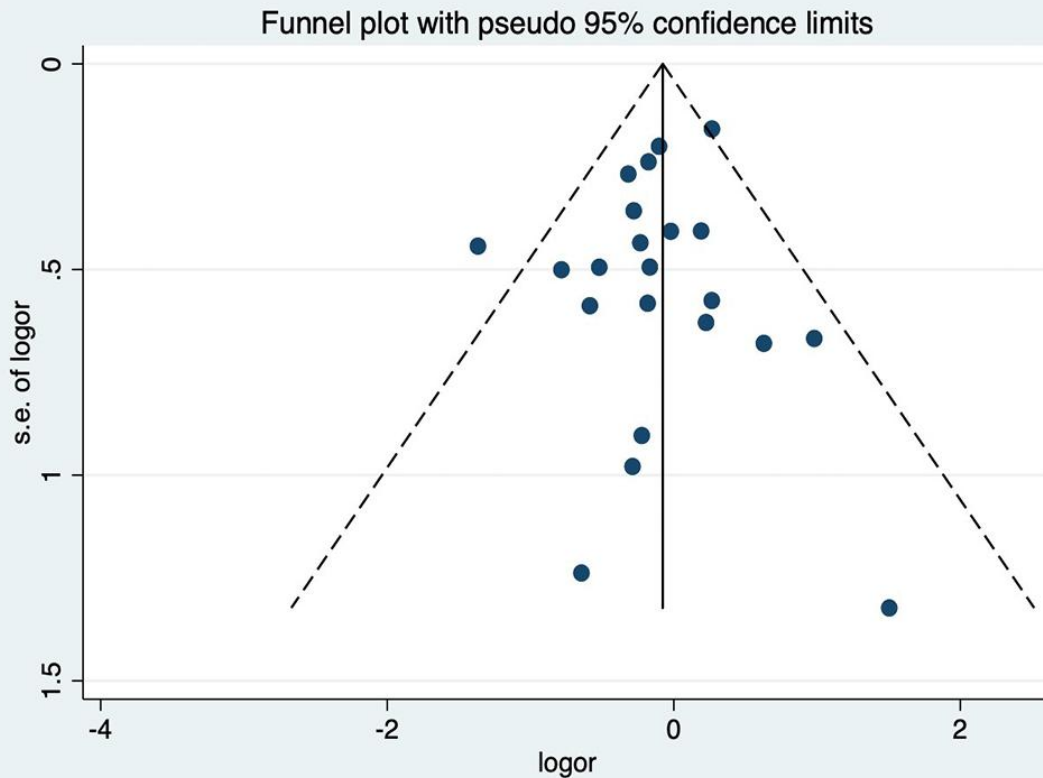

Supplementary Fig. 1 Gender-related forest (a) and funnel plots (b).

Supplement: sj-pdf-1-iji-10.1177_20587384211027679.pdf [file sj-pdf-1-iji-10.1177_20587384211027679.pdf]

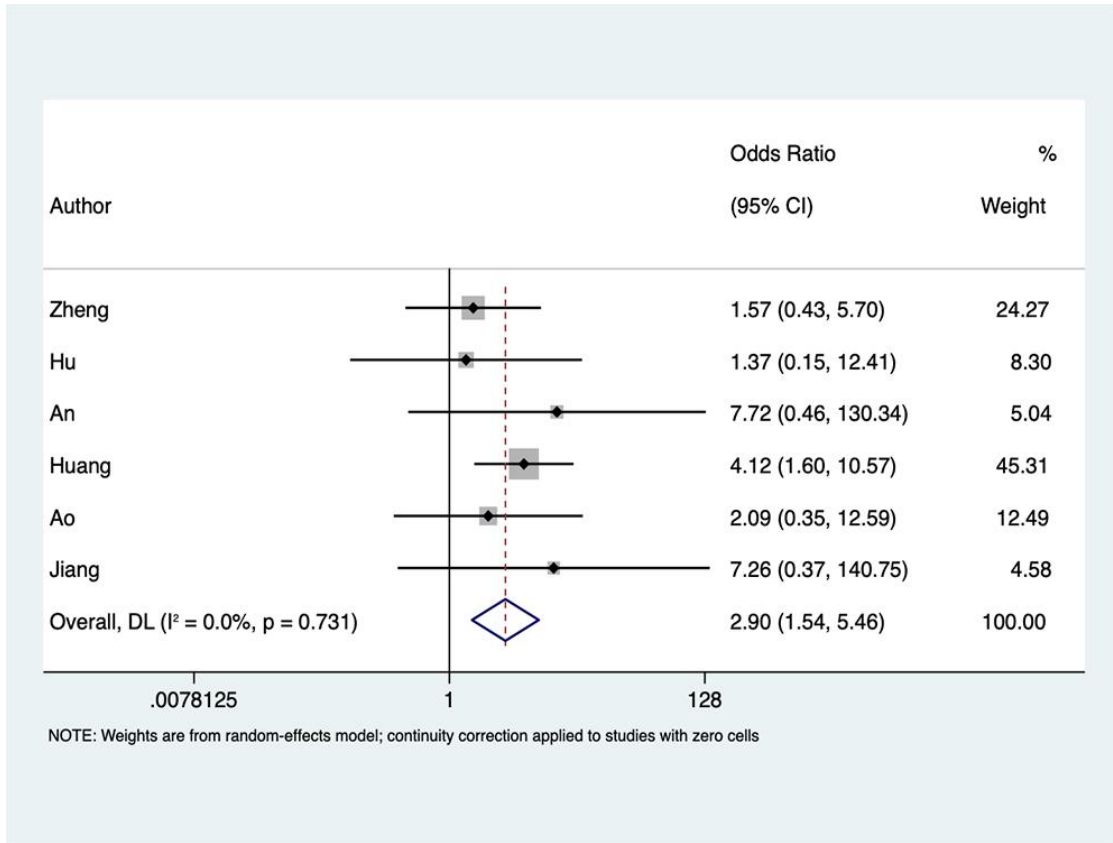

Supplementary Fig. 2 Severity of the illness-related forest.

Supplement: sj-pdf-2-iji-10.1177_20587384211027679.pdf [file sj-pdf-2-iji-10.1177_20587384211027679.pdf]

a

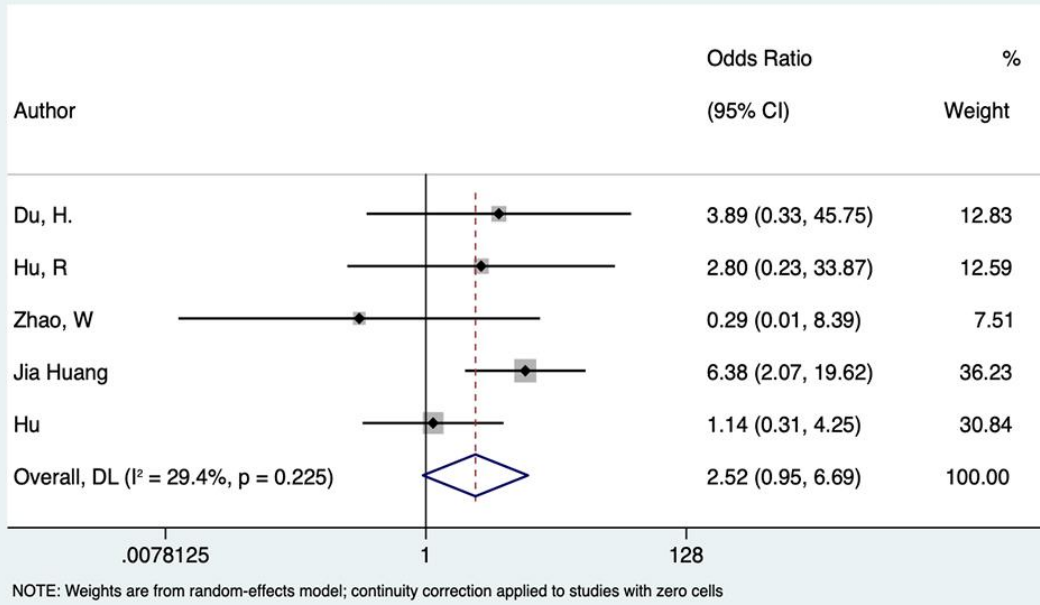

b

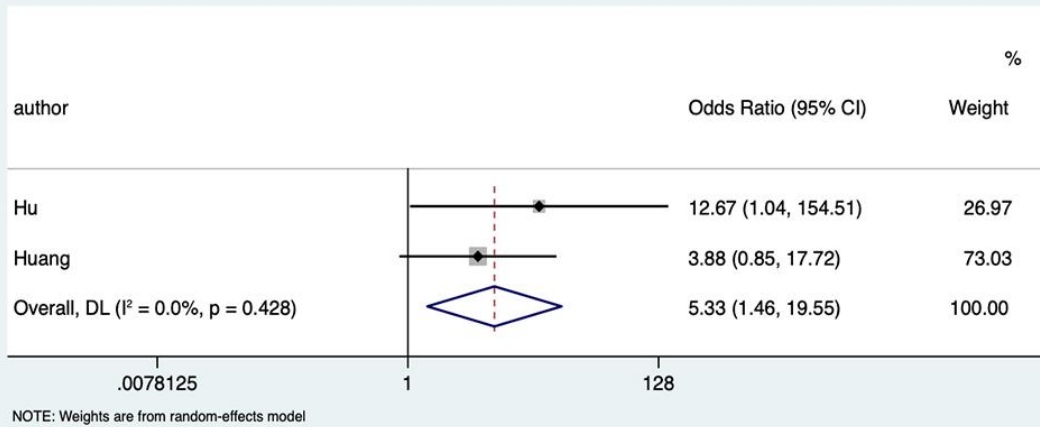

Supplementary Fig. 3 Headache symptoms-related forest (a); dizziness symptom-related forest (b).

Supplement: sj-pdf-3-iji-10.1177_20587384211027679.pdf [file sj-pdf-3-iji-10.1177_20587384211027679.pdf]

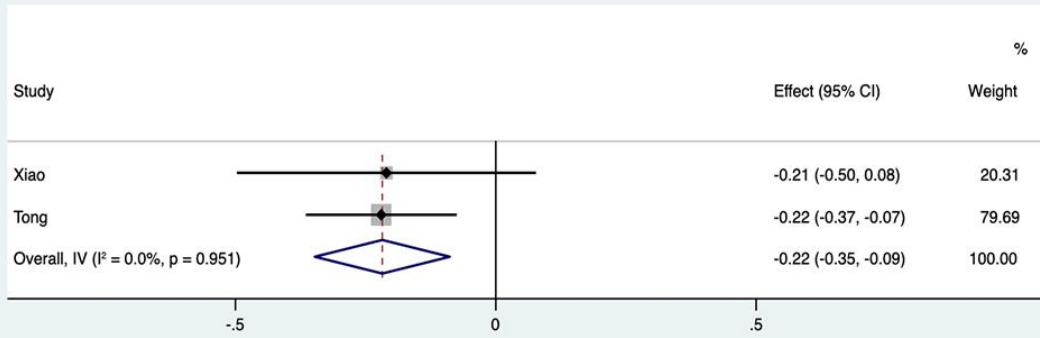

Supplemental Fig. 6 IgM titer related forest.

Supplement: sj-pdf-6-iji-10.1177_20587384211027679.pdf [file sj-pdf-6-iji-10.1177_20587384211027679.pdf]
